# Supplementary material for: FGFR3 in Periosteal Cells Drives Cartilage-to-Bone Transformation in Bone Repair
Source: PubMed Central journal article supplement — Stem Cell Reports. 2020 Sep 10;15(4):955–67. doi: 10.1016/j.stemcr.2020.08.005 (PMC7561512; doi:10.1016/j.stemcr.2020.08.005), 2020-09-10
Supplement: mmc1.pdf [file mmc1.pdf]

**Stem Cell Reports, Volume 15**

**Supplemental Information**

**FGFR3 in Periosteal Cells Drives Cartilage-to-Bone Transformation in  
Bone Repair**

**Anais Julien, Simon Perrin, Oriane Duchamp de Lageneste, Caroline Carvalho, Morad Bensidhoum, Laurence Legeai-Mallet, and Céline Colnot**

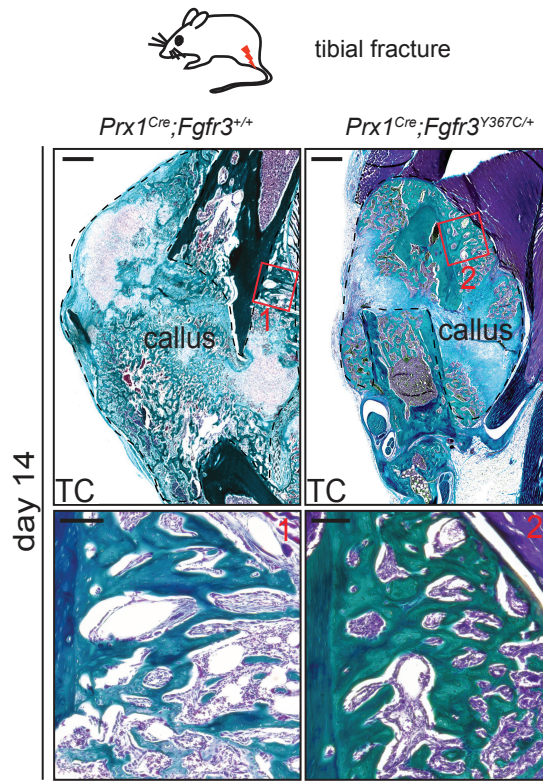

**Figure S1. Direct bone formation at the periphery of the callus is not affected in *Prx1<sup>Cre</sup>;Fgfr3<sup>Y367C/+</sup>* mice.**

(A) Representative Masson's Trichrome (TC) staining of tibial fracture calluses from *Prx1<sup>Cre</sup>;Fgfr3<sup>+/+</sup>* (control) and *Prx1<sup>Cre</sup>;Fgfr3<sup>Y367C/+</sup>* (mutant) mice at day 14 post-fracture and high magnification of new bone area at the periphery of the callus showing normal bone deposition in mutant compared to control. Scale bar: 1mm, high magnification: 100  $\mu$ m.

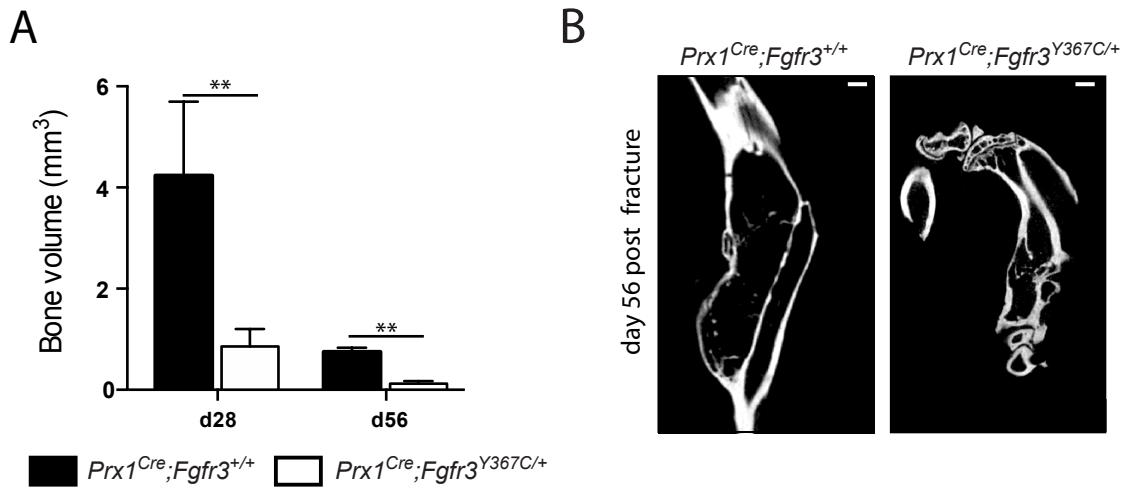

**Figure S2. Reduced bone formation in *Prx1<sup>Cre</sup>;Fgfr3<sup>Y367C/+</sup>* mutant calluses.**

(A) Quantification of bone volume via  $\mu$ CT in the callus of *Prx1<sup>Cre</sup>;Fgfr3<sup>+/+</sup>* control and *Prx1<sup>Cre</sup>;Fgfr3<sup>Y367C/+</sup>* mutant mice at day 28 and 56 post-fracture (n=4-5 per group). (B) Representative  $\mu$ CT images of *Prx1<sup>Cre</sup>;Fgfr3<sup>Y367C/+</sup>* and *Prx1<sup>Cre</sup>;Fgfr3<sup>+/+</sup>* calluses at 56 days post-fracture. Values represent the mean  $\pm$  SD. \*\*p<0.01 using Mann-Whitney test. Scale bar: 1mm.

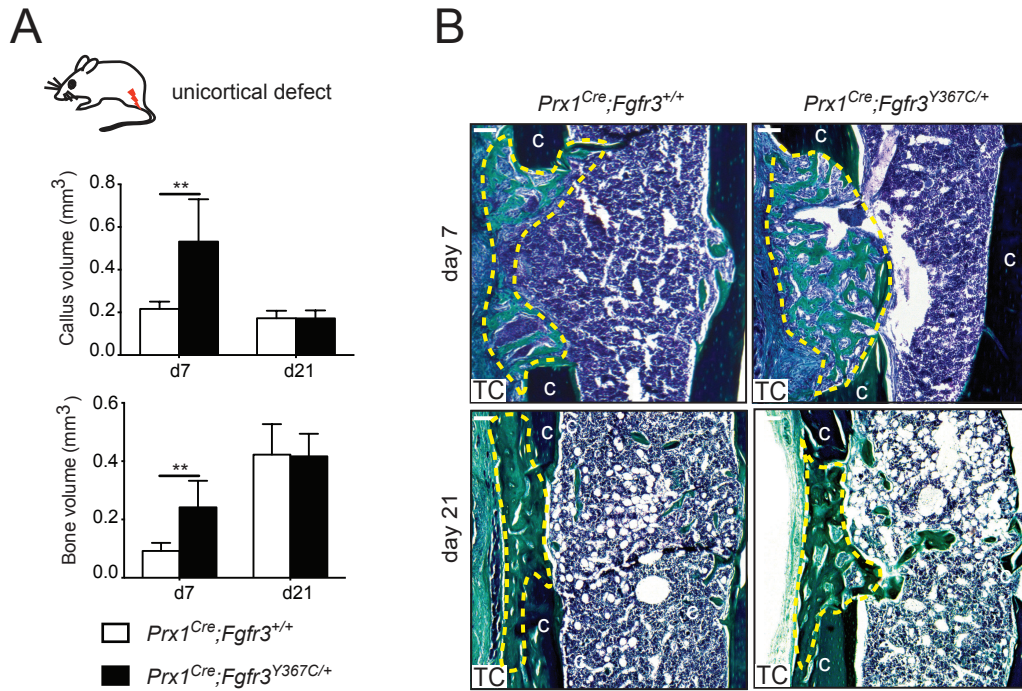

**Figure S3. Healing via intramembranous ossification is unaltered in *Prx1<sup>Cre</sup>;Fgfr3<sup>Y367C/+</sup>* mice.**

(A) Histomorphometric analyses of callus and bone volumes at day 7 and 21 post-unicortical defect in the tibia of *Prx1<sup>Cre</sup>;Fgfr3<sup>+/+</sup>* and *Prx1<sup>Cre</sup>;Fgfr3<sup>Y367C/+</sup>* mice. n=5 per group. (B) Representative TC staining of cortical defect calluses from *Prx1<sup>Cre</sup>;Fgfr3<sup>+/+</sup>* and *Prx1<sup>Cre</sup>;Fgfr3<sup>Y367C/+</sup>* mice at day 7 (upper panels) and day 21 (lower panels). Scale bar: 0.1mm. Values represent the mean  $\pm$  SD. \*\*p<0.01 using Mann-Whitney test.

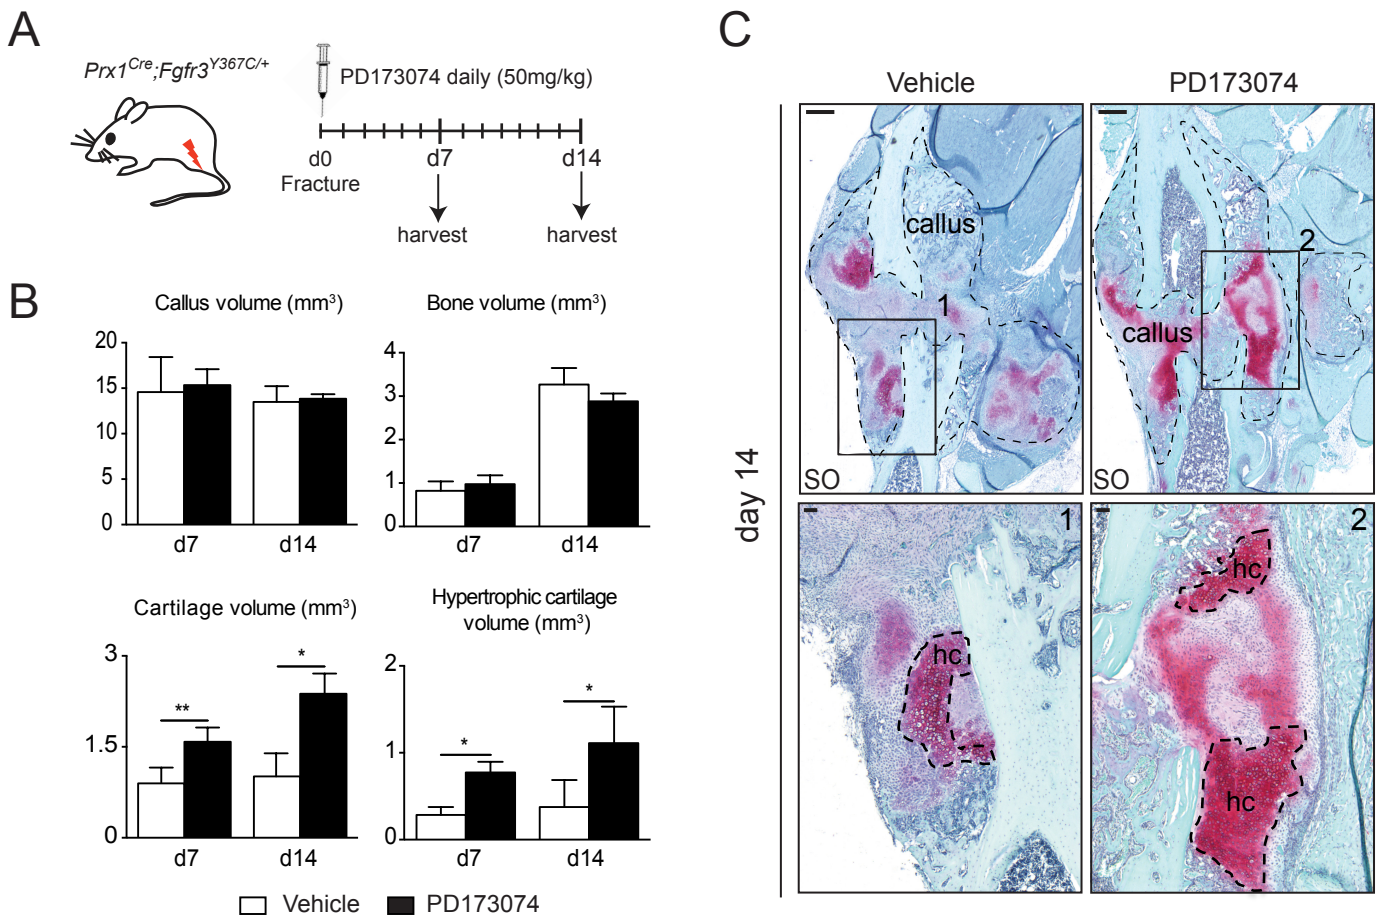

**Figure S4. PD173074 treatment increases cartilage and hypertrophic cartilage in the callus of *Prx1<sup>Cre</sup>;Fgfr3<sup>Y367C/+</sup>* mice.**

(A) Experimental design of daily injection of PD173074 (50mg/kg) or vehicle (control) in *Prx1<sup>Cre</sup>;Fgfr3<sup>Y367C/+</sup>* mice with tibial fracture. (B) Histomorphometric analysis of total callus, bone, cartilage and hypertrophic cartilage volumes of PD173074 treated and control mice at days 7 and 14 post-fracture. (n=4 or 5 per group). (C) Representative callus sections of *Prx1<sup>Cre</sup>;Fgfr3<sup>Y367C/+</sup>* treated and control mice stained with Safranin'O (SO) at day 14 post-fracture and high magnification of hypertrophic cartilage area (Box 1-2). Scale bar: 1mm, high magnification: 150  $\mu$ m.

Values represent the mean  $\pm$  SD. \*\*p<0.01 using Mann-Whitney test.

| REAGENT or RESOURCE                      | SOURCE                            | IDENTIFIER   |
|------------------------------------------|-----------------------------------|--------------|
| <b>Antibodies</b>                        |                                   |              |
| Goat polyclonal anti-CD31                | BioTechne                         | AF3628       |
| Rat polyclonal anti-EMCN                 | Santa Cruz                        | sc-65495     |
| Rabbit polyclonal anti-COLX              | Abcam                             | ab58362      |
| Rabbit polyclonal anti-OSX               | Abcam                             | ab22552      |
| Rabbit polyclonal anti-SOX2              | Abcam                             | ab97959      |
| Rabbit monoclonal anti-SOX9              | Abcam                             | ab182530     |
| Rabbit polyclonal anti-KI67              | Abcam                             | ab15580      |
| Rabbit polyclonal anti-VEGFA             | Abcam                             | ab46154      |
| Goat polyclonal anti-POSTN               | BioTechne                         | AF2955       |
| Mouse monoclonal anti-COLX               | BIOCYC                            | N.2031501005 |
| Alexa Fluor 488 goat anti-rabbit         | Invitrogen                        | A11034       |
| Alexa Fluor 488 donkey anti-goat         | Invitrogen                        | A11055       |
| Alexa Fluor 546 goat anti-rabbit         | Invitrogen                        | A11056,      |
| Alexa Fluor 647 goat anti-rabbit         | Invitrogen                        | A-21245      |
| Rhodamine donkey anti-rat                | Jackson immunoresearch            | 712-025-150  |
| streptavidin-HRP                         | BD Biosciences                    | 554066       |
| CD45-BV650                               | BD Biosciences                    | 563410       |
| TER119-BV650                             | BD Biosciences                    | 747739       |
| CD51-BV711                               | BD Biosciences                    | 740755       |
| THY1-BV786                               | BD Biosciences                    | 564365       |
| TIE2-APC                                 | BioLegend                         | 124009       |
| 6C3-PeCy7                                | BioLegend                         | BLE108313    |
| <b>Chemicals</b>                         |                                   |              |
| PD173074                                 | Sigma                             | P2499        |
| <b>Experimental Models</b>               |                                   |              |
| Mouse : C57BL/6ScNj, Prx1 <sup>Cre</sup> | Jackson Laboratory                | 005584       |
| Mouse : Rosa-tdTomato-EGFP               | Jackson Laboratory                | 007676       |
| Mouse : Fgfr3 <sup>Y367C</sup>           | Laurence Legeai Mallet Laboratory |              |
| <b>Softwares</b>                         |                                   |              |
| FlowJo, LLC software                     | FlowJo, LLC                       |              |
| ZEN software                             | Carl Zeiss                        |              |
| Ctan                                     | Bruker                            |              |
| GraphPad Prism                           | GraphPad                          |              |
